# Supplementary material for: Dissipative particle dynamics simulation study on self-assembly of amphiphilic hyperbranched multiarm copolymers with different degrees of branching
Source: Royal Society of Chemistry journal article supplement (doi:10.1039/c5sm01495f), 2015-01-01

Electronic Supplementary Material (ESI) for Soft Matter.  
This journal is © The Royal Society of Chemistry 2015

Supporting Information for:

**Dissipative Particle Dynamics Simulation Study on Self-Assembly of Amphiphilic  
Hyperbranched Multiarm Copolymers with Different Degrees of Branching**

Haina Tan,<sup>a</sup> Wei Wang,<sup>b</sup> Chunyang Yu,<sup>\*a</sup> Yongfeng Zhou,<sup>\*a</sup> Zhongyuan Lu<sup>\*b</sup> and Deyue Yan<sup>a</sup>

**Schemes S1-S3. The chemical structures of amphiphilic hyperbranched multiarm copolymers HBPO-star-PEO with different degrees of branching (DB) in hyperbranched HBPO cores. The HBPO cores are presented in purple, and PEO arms are presented in green.**

**S1. HBPO-star-PEO with a DB of 21%**

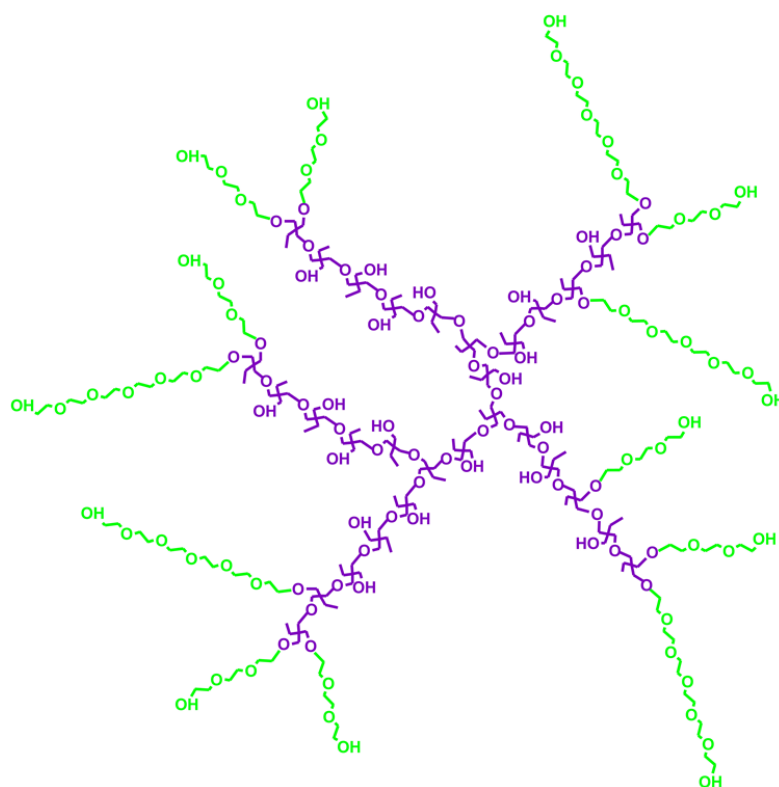

**S2. HBPO-star-PEO with a DB of 35%**

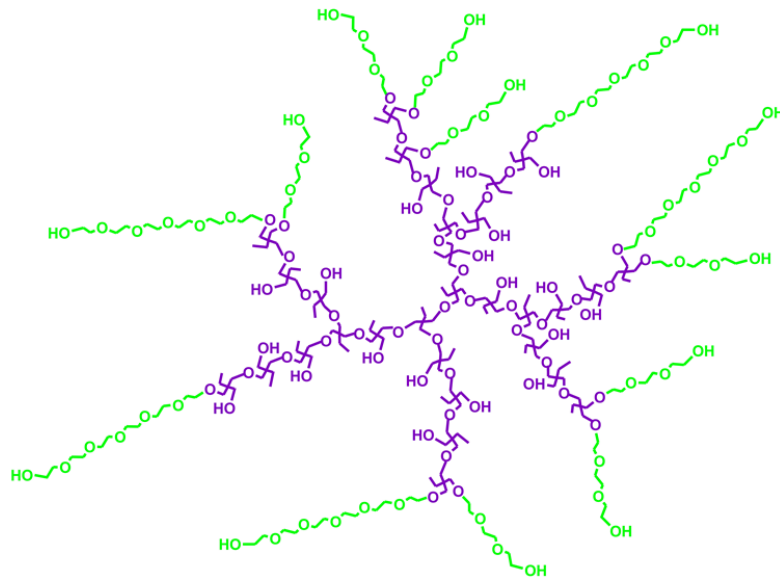

**S3. HBPO-star-PEO with a DB of 50%**

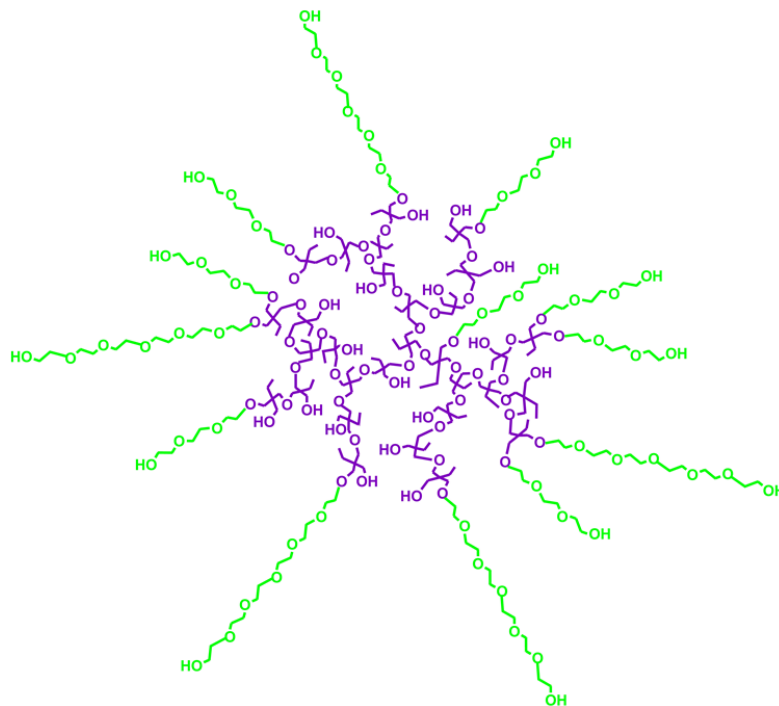

Supplement: c5sm01495f1.pdf [file c5sm01495f1.pdf]
